# Supplementary material
Source: PubMed Central journal article supplement (PMC5959768)
Supplement: NIHMS957598-supplement-Table_S1.pdf [file NIHMS957598-supplement-Table_S1.pdf]

**Table S1: Data collection and refinement statistics. Related to Figure 2.**

| Gas(R201C/C237S)                                                                   |                                             |
|------------------------------------------------------------------------------------|---------------------------------------------|
| <b>Data collection</b>                                                             |                                             |
| Space group                                                                        | P 21 21 21                                  |
| Cell dimensions                                                                    |                                             |
| <i>a</i> , <i>b</i> , <i>c</i> (Å)                                                 | 37.37, 85.58, 125.64                        |
| $\alpha$ , $\beta$ , $\gamma$ (°)                                                  | 90, 90, 90                                  |
| Resolution (Å)                                                                     | 62.82-1.70 (1.79-1.70) <sup>a</sup>         |
| <i>R</i> <sub>merge</sub> , <i>R</i> <sub>meas</sub> , and <i>R</i> <sub>pim</sub> | 0.082 (0.342), 0.090 (0.375), 0.035 (0.149) |
| <i>I</i> / $\sigma$ ( <i>I</i> )                                                   | 12 (3.8)                                    |
| <i>CC</i> <sub>1/2</sub>                                                           | 0.997 (0.926)                               |
| Completeness (%)                                                                   | 98.4 (95.7)                                 |
| Redundancy                                                                         | 6.1 (5.8)                                   |
| <b>Refinement</b>                                                                  |                                             |
| Resolution (Å)                                                                     | 33.04-1.7                                   |
| No. reflections                                                                    | 44420                                       |
| <i>R</i> <sub>work</sub> / <i>R</i> <sub>free</sub>                                | 0.1684/0.2003                               |
| No. atoms                                                                          |                                             |
| Protein                                                                            | 2807                                        |
| Ligand/ion (specify/describe)                                                      | 42                                          |
| Water                                                                              | 249                                         |
| <i>B</i> factors                                                                   |                                             |
| Protein                                                                            | 25.27                                       |
| Ligand/ion                                                                         | 19.79                                       |
| Water                                                                              | 29.88                                       |
| R.m.s. deviations                                                                  |                                             |
| Bond lengths (Å)                                                                   | 0.010                                       |
| Bond angles (°)                                                                    | 0.88                                        |

<sup>a</sup> Values in parentheses are for highest-resolution shell.
